# Supplementary material for: APC/CFZR-1 Controls SAS-5 Levels To Regulate Centrosome Duplication in Caenorhabditis elegans
Source: PubMed Central journal article supplement (PMC5714490; doi:10.1534/g3.117.300260), 2017-10-13
Supplement: 3937FileS1.pdf [file 3937FileS1.pdf]

## Supplemental Materials

### **APC/C<sup>FZR-1</sup> Controls SAS-5 Levels to Regulate Centrosome Duplication in *Caenorhabditis elegans***

Jeffrey C. Medley\*, Lauren E. DeMeyer\*, Megan M. Kabara\* and Mi Hye Song\*<sup>1</sup>

\* Department of Biological Sciences, Oakland University, Rochester, MI 48309, USA.

<sup>1</sup> To whom correspondence should be addressed.

Contact Information: msong2@oakland.edu

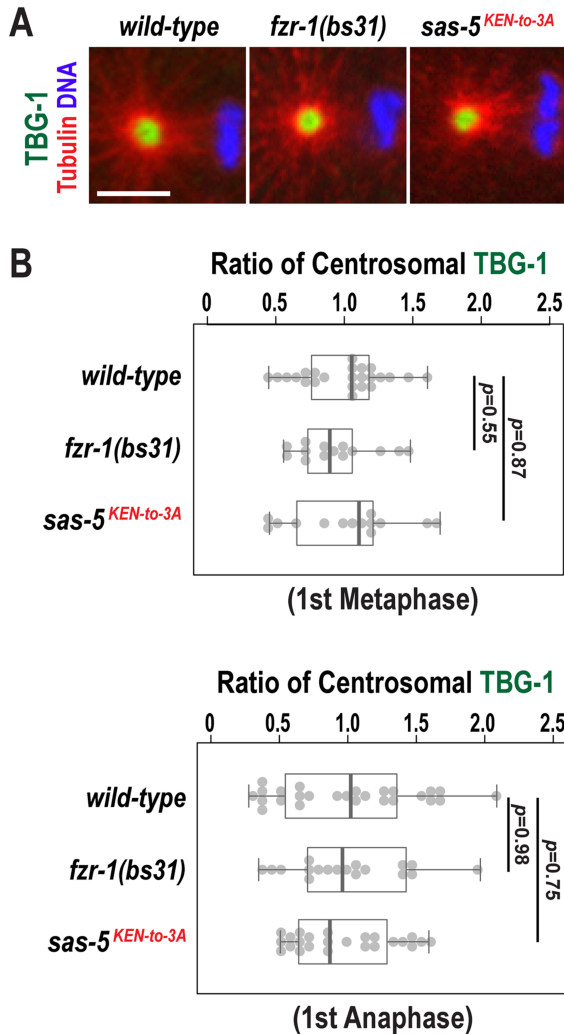

**Figure S1. Centrosome-associated TBG-1 levels are unaffected in *fzr-1(bs31)* and *sas-5<sup>KEN-to-3A</sup>* mutant embryos.** (A) Centrosomes stained for TBG-1 (green) at the first metaphase. Bar, 5 $\mu$ m. (B) Quantification of TBG-1 levels at centrosomes during the first mitosis. TBG-1 levels are normalized to the average fluorescence intensity in wild-type (N2) control embryos. At the first metaphase, *fzr-1(bs31)* ( $0.94\pm 0.28$  fold,  $n=14$ ;  $p=0.55$ ) and *sas-5<sup>KEN-to-3A</sup>* mutants ( $1.02\pm 0.40$  fold,  $n=14$ ;  $p=0.87$ ) have comparable centrosomal TBG-1 levels to the wild-type control ( $1.00\pm 0.30$  fold,  $n=24$ ). At the first anaphase, centrosome-associated TBG-1 levels in both *fzr-1(bs31)* ( $0.99\pm 0.42$  fold,  $n=18$ ;  $p=0.98$ ) and *sas-5<sup>KEN-to-3A</sup>* ( $0.96\pm 0.36$  fold,  $n=24$ ;  $p=0.75$ ) mutant embryos are similar to those of the wild-type control ( $1.00\pm 0.52$  fold,  $n=26$ ).  $n$  is the number of centrosomes. Each dot represents a centrosome. Boxes ranges from the first through third quartile of the data. Thick bar indicates the median. Solid grey line extends 1.5 times the inter-quartile range or to the minimum and maximum data point.

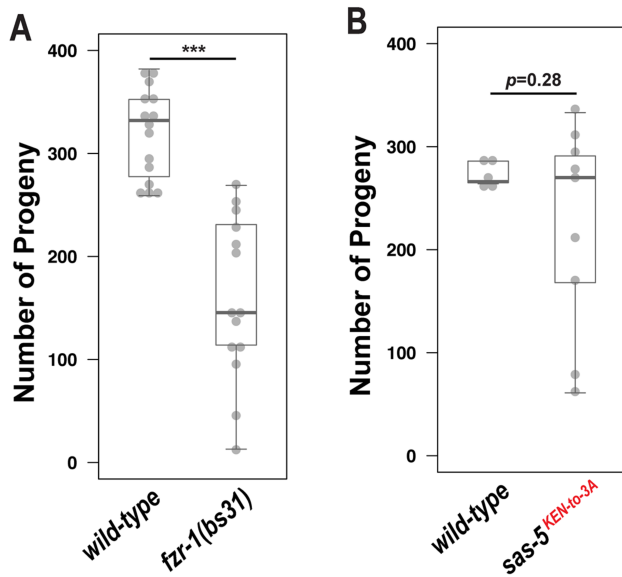

**Figure S2. Brood size in *fzf-1(bs31)* and *sas-5<sup>KEN-to-3A</sup>* mutants.** (A) *fzf-1(bs31)* mutants produce reduced brood size ( $158.4 \pm 78.4$ ,  $n=14$  hermaphrodites;  $p < 0.001$ ) compared to wild-type animals ( $319.6 \pm 43.9$ ,  $n=15$  hermaphrodites) grown at  $24^\circ$ . Note that *fzf-1(bs31)* mutants produce a wide range of distribution in brood size among 14 animals tested, which is also seen in *sas-5<sup>KEN-to-3A</sup>* mutants. (B) *sas-5<sup>KEN-to-3A</sup>* mutants display a slight reduction in brood size ( $222.7 \pm 99.7$ ,  $n=9$  hermaphrodites;  $p=0.28$ ) compared to wild-type controls ( $273.4 \pm 11.5$ ,  $n=5$  hermaphrodites) grown at  $24^\circ$ . Compared to wild-type animals, *sas-5<sup>KEN-to-3A</sup>* mutant animals produce highly irregular number of progeny in the population of nine animals tested under the same condition. Each dot represents the total number of progeny produced by a single animal. Box ranges from the first through third quartile of the data. Thick bar indicates the median. Solid grey line extends 1.5 times the inter-quartile range or to the minimum and maximum data point.

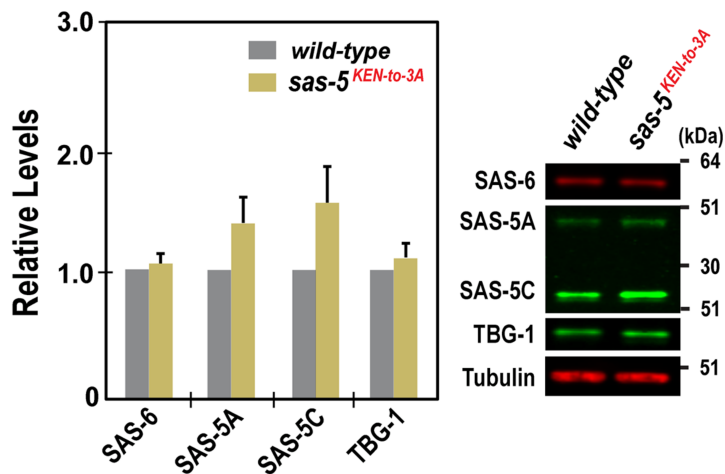

**Figure S3. SAS-5 levels are increased in *sas-5*<sup>KEN-to-3A</sup> mutants.** Quantitative western blot reveals that (left panel) *sas-5*<sup>KEN-to-3A</sup> mutant embryos contain increased levels of both SAS-5 isoforms, SAS-5A (1.36±0.20 fold) and SAS-5C (1.52±0.28 fold), compared to wild-type (N2) control embryos. In contrast, there were no significant changes in either SAS-6 (1.05±0.04 fold) or TBG-1 (1.09±0.11 fold) levels between *sas-5*<sup>KEN-to-3A</sup> mutant and wild-type controls. Four biological samples and six technical replicates were used for the statistical analysis. Average values are presented and error bars are SD. (right panel) Representative western blot using embryonic lysates from *sas-5*<sup>KEN-to-3A</sup> mutants and wild-type (N2) animals. Tubulin was used as a loading control.



**Table S1. List of *C. elegans* Strains Used in This Study**

| Name   | Genotype                                                                                                                | Origin                                               |
|--------|-------------------------------------------------------------------------------------------------------------------------|------------------------------------------------------|
| N2     | <i>wild-type</i>                                                                                                        | CGC                                                  |
| CB4856 | <i>wild-type, Hawaiian variant</i>                                                                                      | CGC                                                  |
| CB120  | <i>unc-4(e120) II</i>                                                                                                   | Brenner 1974                                         |
| CB128  | <i>dpy-10(e128) II</i>                                                                                                  | Brenner 1974                                         |
| MJ57   | <i>emb-1(hc57) III</i>                                                                                                  | Schierenberg <i>et al.</i> 1980                      |
| MTU6   | <i>fzr-1(bs31) II</i>                                                                                                   | This study                                           |
| MTU7   | <i>mat-3(or180) III</i>                                                                                                 | Golden <i>et al.</i> 2000                            |
| MTU8   | <i>zyg-1(it25) II; mat-3(or180) III</i>                                                                                 | This study                                           |
| MTU9   | <i>zyg-1(it25) II; emb-1(hc57) III</i>                                                                                  | This study                                           |
| MTU10  | <i>unc-119(ed3) III; [unc-119(+); fzr-1p::fzr-1::gfp::fzr-1 3'UTR]</i>                                                  | This study<br>Sarov <i>et al.</i> 2012               |
| MTU11  | <i>sas-5(mhs357) [sas-5<sup>KEN-to-3A</sup>] V</i>                                                                      | This study                                           |
| MTU12  | <i>sas-5(mhs358) [sas-5<sup>KEN-to-3A</sup>] V</i>                                                                      | This study                                           |
| MTU13  | <i>zyg-1(it25) II; sas-5(mhs359) [sas-5<sup>KEN-to-3A</sup>] V</i>                                                      | This study                                           |
| MTU14  | <i>zyg-1(it25) II; sas-5(mhs361) [SAS-5<sup>KEN-to-KEN</sup>] V</i>                                                     | This study                                           |
| MTU15  | <i>zyg-1(it25) II; sas-5(mhs362) [sas-5<sup>KEN-to-3A</sup>] V</i>                                                      | This study                                           |
| OC13   | <i>zyg-1(or409) II</i>                                                                                                  | Kemp <i>et al.</i> 2007                              |
| OC14   | <i>zyg-1(it25) II</i>                                                                                                   | Kemphues <i>et al.</i> 1988                          |
| OC130  | <i>zyg-1(it25) fzr-1(bs38) II</i>                                                                                       | Kemp <i>et al.</i> 2007                              |
| OC190  | <i>unc-119(ed3) III; bsIs6 [unc-119(+), pie-1p::gfp::fzr-1]</i>                                                         | This study                                           |
| OC201  | <i>zyg-1(it25) fzr-1(bs31) II</i>                                                                                       | Kemp <i>et al.</i> 2007                              |
| OC481  | <i>unc-119(ed3) III; bsIs15[pNP99; unc-119(+), tbb-1p::mCherry::tbb-2::tbb-2 3'UTR]</i>                                 | Gift from O'Connell Lab<br>Medley <i>et al.</i> 2017 |
| OC740  | <i>bsSi15[pKO109; unc-119(+), spd-2p::spd-2::mCherry::spd-2 3'UTR] I</i>                                                | Peel <i>et al.</i> 2017                              |
| SA250  | <i>tjIs54[pie-1p::GFP::tbb-2 + pie-1p::2xmCherry::tbg-1 + unc-119(+)]; tjIs57[pie-1p::mCherry::his-48 + unc-119(+)]</i> | Toya <i>et al.</i> 2010                              |

**Table S2. List of Oligonucleotides for CRISPR/Cas9 Genome Editing**

| Construct                                            | Sequence (5'-3')                                                                                                           |
|------------------------------------------------------|----------------------------------------------------------------------------------------------------------------------------|
| <i>sas-5</i> (KEN-box) crRNA                         | UUCUGCUGUCUUGAUUGACG                                                                                                       |
| <i>dpy-10</i> crRNA<br>(Arribere <i>et al.</i> 2014) | GCUACCAUAGGCACCACGAG                                                                                                       |
| SAS-5-KEN-AAA ssODN                                  | CTAAACAGCAAGCGATCGAACCAGTTGAAAAAGACGCTG<br>CTGCTTTTCATGAGAGTCCTAGACAGTCTCGTCAACAAAA<br>GCCAGCTAGTAAAGTGAGAATTCAGATAAAAAATA |
| <i>dpy-10</i> ssODN<br>(Arribere <i>et al.</i> 2014) | CACTTGAACCTCAATACGGCAAGATGAGAATGACTGGAAA<br>CCGTACCGCATGCGGTGCCTATGGTAGCGGAGCTTCACA<br>TGGCTTCAGACCAACAGCCTAT              |

## Supplemental References

Arribere, J. A., R. T. Bell, B. X. Fu, K. L. Artiles, P. S. Hartman *et al.*, 2014 Efficient marker-free recovery of custom genetic modifications with CRISPR/Cas9 in *Caenorhabditis elegans*. *Genetics* 198: 837-846.

Brenner, S., 1974 The genetics of *Caenorhabditis elegans*. *Genetics* 77: 71-94.

Golden, A., P. L. Sadler, M. R. Wallenfang, J. M. Schumacher, D. R. Hamill *et al.*, 2000 Metaphase to anaphase (*mat*) transition-defective mutants in *Caenorhabditis elegans*. *J Cell Biol* 151: 1469-1482.

Kemp, C. A., M. H. Song, M. K. Addepalli, G. Hunter and K. O'Connell, 2007 Suppressors of *zyg-1* define regulators of centrosome duplication and nuclear association in *Caenorhabditis elegans*. *Genetics* 176: 95-113.

Kemphues, K. J., M. Kusch and N. Wolf, 1988 Maternal-effect lethal mutations on linkage group II of *Caenorhabditis elegans*. *Genetics* 120: 977-986.

Medley, J. C., M. M. Kabara, M. D. Stubenvoll, L. E. DeMeyer and M. H. Song, 2017 Casein kinase II is required for proper cell division and acts as a negative regulator of centrosome duplication in *Caenorhabditis elegans* embryos. *Biol Open* 6: 17-28.

Peel, N., J. Iyer, A. Naik, M. P. Dougherty, M. Decker *et al.*, 2017 Protein Phosphatase 1 Down Regulates ZYG-1 Levels to Limit Centriole Duplication. *PLoS Genet* 13: e1006543.

Sarov, M., J. I. Murray, K. Schanze, A. Pozniakovski, W. Niu *et al.*, 2012 A genome-scale resource for *in vivo* tag-based protein function exploration in *C. elegans*. *Cell* 150: 855-866.

Schierenberg, E., J. Miwa and G. von Ehrenstein, 1980 Cell lineages and developmental defects of temperature-sensitive embryonic arrest mutants in *Caenorhabditis elegans*. *Dev Biol* 76: 141-159.

Toya, M., Y. Iida and A. Sugimoto, 2010 Imaging of mitotic spindle dynamics in *Caenorhabditis elegans* embryos. *Methods Cell Biol* 97: 359-372.
